1 Seasonal and depth variations in diet composition and dietary overlap between three native  
2 killifish of an emblematic tropical-mountain lake: Lake Titicaca (Bolivia)

3

4 Erick Loayza

5

6

7 Unidad de Limnología, Instituto de Ecología, Universidad Mayor de San Andrés, La Paz,  
8 Bolivia.

9

10

11 CORRESPONDENCE

12

13 Erick Loayza, Unidad de Limnología, Instituto de Ecología, Universidad Mayor de San  
14 Andrés, Campus Universitario de Cota Cota, Casilla Central 10077 – Correo Central, La  
15 Paz, Bolivia

16 Email: [erickz.loayzatorrico@gmail.com](mailto:erickz.loayzatorrico@gmail.com)

17

18

19

20

21

22

23

24

25 ABSTRACT

26 Lake Titicaca (~3800 m a.s.l.), an emblematic tropical-mountain ecosystem is the  
27 major source of fish for people on the Altiplano. The Andean killifish genus *Orestias*,  
28 represent an important resource for local fisheries in Lake Titicaca. It has been suggested  
29 that exist an effect of segregation in the Lake Titicaca in order to avoid competition for  
30 food resource between native fish species, due most of *Orestias* species share the littoral  
31 habitat, which is now also share with introduced species. Such scenario increases the  
32 pressure for food resource. Here I examined the gut content of *O. luteus*, *O. agassizii* and  
33 *O. mulleri* (Cuvier & Valenciennes, 1846) from a bay of Lake Titicaca during rainy (April)  
34 and dry season (July) with the predominance method, frequency of occurrence and  
35 numerical percentage to describe the diet and dietary overlap between these native fish. I  
36 also applied a PERMANOVA test in order to determine diet variations related to depth and  
37 seasonally, as well as the Levins and Pianka's index to test diet breadth and dietary overlap  
38 respectively. 396 gut contents were evaluated, identifying a high frequency of amphipods  
39 and molluscs in the three *Orestias* native species. Diet breadth revelled a selectivity for a  
40 few preys and the composition of the diets was influenced mainly by depth, followed by  
41 seasonality (PERMANOVA,  $P = <0.05$ ). Dietary overlapping between *O. luteus* and *O.*  
42 *agassizii* was evidenced in the rainy season. During the dry season, the three species  
43 undergone dietary overlapping. This study provided a detail knowledge on the diet  
44 variations of native species in Lake Titicaca, especially for *Orestias mulleri*, a little-known  
45 species. Here I also discussed the importance of the amphipods as a food resource in Lake  
46 Titicaca not only for fish community, but for the food web in general. The seasonal and  
47 depth diet variations here discussed are relevant for fisheries management and conservation  
48 and could be used to guide aquaculture development in Lake Titicaca.

49

50 1 | INTRODUCTION

51

52 The Altiplano is one of the largest high plateaus in the world containing the Lake  
53 Titicaca, the largest navigable water body in the world (3809 m a.s.l.), and also the most  
54 important water resource of the Andean region. Lake Titicaca represents the major source  
55 of fish for ~3 million people on the Altiplano, between native and introduced fish. Waters  
56 of Lake Titicaca are mainly oligotrophic, with almost constant light and temperature  
57 conditions and permanently hyperhaline due to the geographical characteristics and the lack  
58 of strong seasonality on the region (Dejoux & Iltis, 1992). Nevertheless, it is not clear if  
59 this lack of seasonality has an influence on the behaviour or foraging strategies of the  
60 native ichthyofaunal, represented mainly for *Orestias* (Valenciennes, 1839) one of the  
61 endemic genus of the Altiplano (Dejoux & Iltis, 1992; Vila, Pardo & Scott, 2007).

62 *Orestias* have 23 species described for Lake Titicaca, although only a few are  
63 recognized (Dejoux & Iltis, 1992; Vila *et al.*, 2007; Ibañez *et al.*, 2014). It has been  
64 suggested that exist an effect of segregation in the habitat, reason why exist such  
65 morphological variability in this genus (Lauzanne, 1982; Loubens, 1989; Dejoux & Iltis,  
66 1992; Maldonado *et al.*, 2009). *Orestias* are an important piece in the trophic network in  
67 Lake Titicaca, however, their diet descriptions are based mainly on general observations  
68 and not on specific studies (Ibañez *et al.*, 2014). In addition, most of *Orestias* species have  
69 benthic habits and share the littoral habitat with juveniles of pejerrey (*Odontesthes*  
70 *bonariensis*, Valenciennes, 1835) an introduced species (Monroy *et al.*, 2014).

71 *Orestias agassizii* (Cuvier & Valenciennes, 1846) and *Orestias luteus* (Cuvier &  
72 Valenciennes, 1846) are the *Orestias* with most economically relevant for local fisheries.

73 They coexist throughout the lake and are frequently found in the littoral zone near to the  
74 shore. However, *O. agassizii* is capable of being in littoral and pelagic zones, while *O.*  
75 *luteus* inhabits benthic zone, where it coexists with *Orestias mulleri* (Cuvier &  
76 Valenciennes, 1846), which is considered a bentopelagic fish (Monroy *et al.*, 2014).  
77 Nowadays, there is a lack of knowledge about the trophic interactions, diet breadth and  
78 other aspects of feeding ecology of *Orestias*, due the studies on these fish were focused on  
79 morphological and taxonomic analysis (Ibañez *et al.*, 2014; Guerrero-Jiménez *et al.*, 2017).

80 *Orestias* usually inhabit littoral zone in Lake Titicaca, as well as smaller sizes of  
81 introduced species such as trout (*Oncorhynchus mykiss*, Walbum, 1792) and pejerrey  
82 (*Odontesthes bonariensis*, Valenciennes, 1835) so they belong to the same trophic level  
83 (Monroy *et al.*, 2014). Therefore, there is a niche overlap and competition for food resource  
84 are very likely, however there are no studies that prove this hypothesis. It is well known  
85 that feeding is a non-linear behaviour with many scaled gradients, such as time (i.e., time of  
86 year), space (i.e., change through depth), morphology (i.e., morphology of the prey or size  
87 of the predator) or other biological attributes (Saikia, 2016).

88 Future environmental changes are inevitable, especially in relation to new  
89 environmental problems such as climate change and the pressures of invasive species,  
90 which represent a common threat to the native fish populations. This can affect the  
91 functions of an ecosystem and trophic relationships (predator-prey interactions), which are  
92 a very important component of studies at the ecosystem level, particularly because species  
93 can modify their diet in response to these changes. Therefore, here I describe the diet, their  
94 breadth and dietary overlap of three native species (*O. agassizii*, *O. luteus* and *O. mulleri*)  
95 that coexist in a bay of Lake Titicaca, a tropical-mountain ecosystem. Further, I evaluate  
96 the diet variations in relation to depth and seasonality.

97

## 98 2 | METHODS

99

### 100 2.1 | Study area

101 Lake Titicaca is the largest freshwater lake in South America, with 8559 km<sup>2</sup> area  
102 and located at 3810 m.a.s.l. It is divided into two sub-basins: Lago Mayor, which reaches  
103 285 m maximum depth, and Lago Menor, with a maximum 40 m depth (Dejoux & Iltis,  
104 1992). Although there is a lack of seasonality on the region, exist a marked increase in  
105 rainfall (between December and March) and a dry season (between May and August)  
106 (Myers *et al.*, 2000; Vila *et al.*, 2007).

107 This study focused on Toke Pucuro Bay, near the small town of Achacachi (Figure  
108 1), which, like most of the shores on Lago Mayor, has three types of habitats: 1) the pelagic  
109 zone (i.e., open waters of the lake) with abundant cladocerans and other zooplankton; 2) the  
110 benthic zone (i.e., near bottom area) rich in molluscs and amphipods and 3) the coastal zone  
111 characterized by being rich in macrophytes such as totoras (*Schoenoplectus californicus*  
112 *ssp. tatora*), juncus (*Juncus articus ssp. andicola*), and other genera such as *Chara*,  
113 *Potamogeton*, *Myriophyllum*, *Nitella* and *Ruppia* in which a large number of amphipods are  
114 found (Dejoux & Iltis, 1992; Lauzanne, 1992; Vila *et al.*, 2007). These vegetation area  
115 represents an important area of feeding and reproduction for fish in the lake (Lauzanne,  
116 1992).

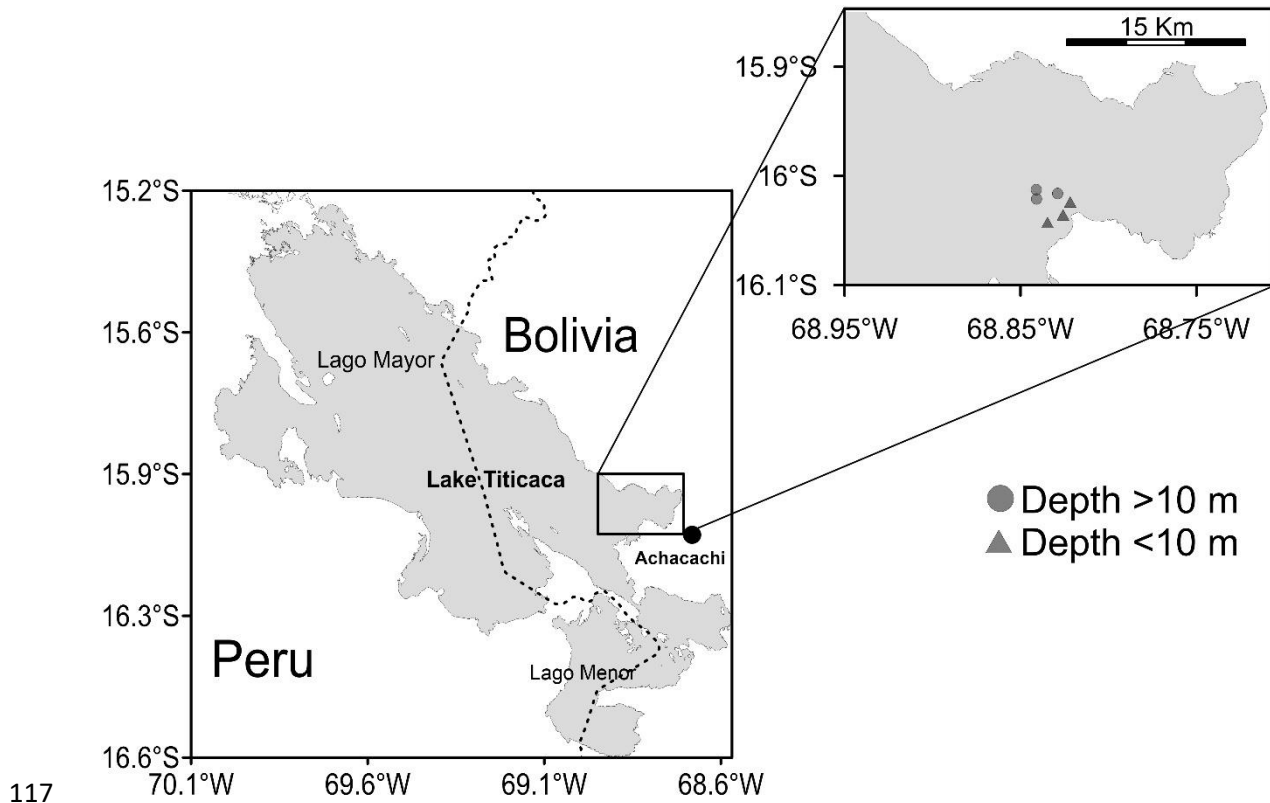

117

118 Figure 1. Sampling location of shallow waters fishing sites (< 10 m) (grey triangle) and  
119 deep water (> 10 m) (grey circle) in Lake Titicaca in April and July 2018.

120

## 121 2.2 | Fish sampling

122

123 Experimental gillnets of 12 panels of 11 mm to 110 mm openings were used, as  
124 well as gillnets (48 mm opening) from a local fisherman. Fish sampling were made at the  
125 end of the rainy season (April) and during the dry season (July) 2018. 3 shallow habitats  
126 with depth <10 m (9.1 m max. depth) and 3 pelagic habitats with depth > 10 m (21.4 m  
127 max. depth) were sampled evenly distributed in the study area. At the same time, 3 samples  
128 of benthic invertebrate collected at each fish sampling site were taken with an Eckman  
129 dredger to determine the composition of the possible fish prey. The samples of benthic

130 invertebrate were fixed in 10% formalin and were identified at the highest taxonomic level  
131 possible.

132 Fish were identified at the species level, measured, weighed and euthanized in 96%  
133 ethanol (Metcalf & Craig, 2011). Guts were removed *in situ* and fixed in 75% ethanol to  
134 avoid degradation of the gut contents. Fish total length (TL) were measured to the nearest  
135 0.01 mm using a digital meter. Fish and gut were weighed to the nearest 0.01 g using a  
136 digital scale. Gut contents were examined with a microscope (X40) in which the  
137 identifiable parts of the organisms were considered as individuals and identified with the  
138 lowest taxon possible.

139

### 140 2.3 | Analysis

141

142 Representativeness of the samplings was estimated using an accumulation curve  
143 randomized with respect to the number of gut contents reviewed. Prey diversity consumed  
144 by three *Orestias* native species studied was established by the Simpson index (Magurran,  
145 2013):

$$146 \quad D = 1 - \sum_i \frac{ni (ni - 1)}{N(N - 1)}$$

147 Where " $N$ " is the total number of prey and " $ni$ " is the number of individuals of prey  
148 " $i$ " (Hurlbert, 1971). Prey richness (number of prey in the gut content) was calculated and  
149 the diet breadth using the standardized Levins index (Levins, 1974; Krebs, 1999):

$$150 \quad B = \frac{1}{\sum P_i^2}$$

151           Where “ $p_i$ ” is the proportion of individuals of the “ $i$ ” prey found in one of three  
152 study species. Levins index standardized ( $BA = B-1 / n-1$ ) was applied to express the diet  
153 breadth in a scale that fluctuates between 0 and 1. Lower values than 0.60 are considered as  
154 a specialized diet using a low resource number, and values above 0.60 as a generalist  
155 (Krebs, 1999). Pianka’s symmetric index (1974) was measured to estimate the niche  
156 overlap in the diet composition between each species, depth and season (Guerrero *et al.*,  
157 2015). It is considered a biologically significant overlap when the value of this index  
158 exceeds 0.6 (Pianka, 1974).

159           Diet composition was quantified by a semi-quantitative visual estimate of the prey  
160 abundance (zooplankton, amphipods, insects, macrophytes, algae, molluscs, ostracods,  
161 sediments, fish eggs and others), according to five categories: absent (0%), very rare (25%),  
162 rare (50%), abundant (75%) and very abundant (100%) following the modifications of the  
163 predominance method (Frost & Went, 1940; Tresierra Aguilar & Culquichicón Malpica,  
164 1993). Frequency of occurrence (%FO) and numeric percentage (%N) (Hyslop, 1980;  
165 Zavala-Camin, 1996) of each species according to depth and season was expressed as:

$$166 \quad \%FO_i = \frac{\text{number of stomachs containing prey type } i}{\text{number of stomachs with identifiable prey present}} \times 100$$

$$167 \quad \%Ni = \frac{\text{number of prey type } i}{\text{sum total all identifiable prey from all categories}} \times 100$$

168           Gravimetric or volumetric measurements were not made, since the presence of  
169 sediment and detritus in gut content makes them unfeasible, as fractionation and different  
170 digestibility of each component diet could bias this measure (Cardona, 1991), as well as  
171 generating problems in the interpretation (Baker, Buckland & Sheaves, 2014; Buckland *et*  
172 *al.*, 2017).



173 An analysis of similarities (ANOSIM,  $\alpha = 0.05$ ) of the distances of Bray-Curtis with  
174 the abundances of benthic invertebrate with 9999 permutations was performed to test  
175 differences in the composition of the benthic preys between depths and season. To test  
176 intraspecific between depths and seasonal differences in diet composition, permutational  
177 multivariate analysis of variance (PERMANOVA) of the abundance of the gut content was  
178 applied, using the similarity of Bray-Curtis with 9999 permutations. Processing and  
179 analysis were performed in RStudio, version 1.1.453 (RStudio 2016) with R, version 3.4.0  
180 (R Core Team, 2018) and the packages vegan (Oksanen *et al.*, 2018), spaa (Jinlong, 2016)  
181 and BiodiversityR (Kindt & Coe, 2005).

182

### 183 3 | RESULTS

184

#### 185 3.1 | Benthic invertebrate composition in habitat

186 In total were recorded nineteen taxa of benthic invertebrate (Table 1). Taxa richness  
187 between depths was the same at the end of rainy season (April), slightly different during  
188 dry season (July). On the other hand, the abundance did not change between depths, but  
189 they were different between seasons. *Hyalella* spp. (40.32% at a depth < 10 m, 46.29% at a  
190 depth > 10 m) and Hydrobiidae (25.43% at a depth < 10 m, 16.20% at a depth > 10 m)  
191 abundances were higher during rainy season, whereas during dry season were *Hyalella* spp.  
192 (73.76% at a depth < 10 m, 64.19% at a depth > 10 m) and Hirudinea (10.40% at a depth <  
193 10 m, 13.07% at a depth < 10 m).

194

195 TABLE 1 Abundance of benthic invertebrates in two different depths and seasons. End of  
196 the rainy season (APR), dry season (JUL) in Toke Pucuro Bay, Lake Titicaca.

| Taxon                  | APR    |              |        |              | JUL    |              |        |              |
|------------------------|--------|--------------|--------|--------------|--------|--------------|--------|--------------|
|                        | < 10 m |              | > 10 m |              | < 10 m |              | > 10 m |              |
|                        | N      | %            | N      | %            | N      | %            | N      | %            |
| <i>Hyalella</i> spp    | 1362   | <b>40.32</b> | 2415   | <b>46.29</b> | 12074  | <b>73.76</b> | 6400   | <b>64.19</b> |
| Planorbidae            | 0      | 0            | 0      | 0            | 0      | 0            | 45     | 0.45         |
| Hydrobiidae            | 859    | <b>25.43</b> | 845    | <b>16.20</b> | 1156   | 7.06         | 1185   | <b>11.89</b> |
| Corixidae              | 0      | 0            | 0      | 0            | 0      | 0            | 15     | 0.15         |
| Chironomidae           | 30     | 0.89         | 15     | 0.29         | 711    | 4.34         | 133    | 1.33         |
| Oligochaeta            | 222    | 6.57         | 15     | 0.29         | 163    | 1            | 74     | 0.74         |
| Hirudinea              | 267    | 7.90         | 267    | 5.12         | 1703   | <b>10.40</b> | 1303   | <b>13.07</b> |
| <i>Anisancylus</i> sp. | 45     | 1.33         | 844    | <b>16.18</b> | 89     | 0.54         | 30     | 0.30         |
| <i>Sphaerium</i> sp.   | 15     | 0.44         | 0      | 0            | 192    | 1.17         | 265    | 2.66         |
| Cyprididae             | 74     | 2.19         | 30     | 0.58         | 162    | 0.99         | 44     | 0.44         |
| Hydridae               | 237    | 7.02         | 238    | 4.56         | 30     | 0.18         | 74     | 0.74         |
| Elmidae                | 15     | 0.44         | 0      | 0            | 0      | 0            | 0      | 0            |
| <i>Hedruris</i> sp     | 0      | 0            | 74     | 1.42         | 0      | 0            | 15     | 0.15         |
| Colembola              | 0      | 0            | 0      | 0            | 15     | 0.09         | 0      | 0            |
| Planariidae            | 89     | 2.63         | 74     | 1.42         | 74     | 0.45         | 149    | 1.49         |
| Beatidae               | 0      | 0            | 15     | 0.29         | 0      | 0            | 0      | 0            |
| Muscidae               | 0      | 0            | 15     | 0.29         | 0      | 0            | 0      | 0            |
| Cladocera              | 104    | 3.08         | 370    | 7.09         | 0      | 0            | 208    | 2.09         |
| Copepoda               | 59     | 1.75         | 0      | 0            | 0      | 0            | 30     | 0.30         |
| N° taxa                | 13     |              | 13     |              | 11     |              | 15     |              |

Species abundant are highlighted in bold

197 Benthic invertebrate composition showed a significant difference between seasons  
198 ( $p < 0.01$ ) and the R value for depths comparison was close to 0, which indicates that  
199 benthic invertebrate composition was similar to each other (Table 2).

200

201 TABLE 2 Analysis of similarity (ANOSIM) of two pathways of the composition of aquatic  
202 invertebrates in different seasons and depths from the Bray-Curtis distances with the  
203 abundances of benthic invertebrates with 9999 permutations.

| Factor | R        | <i>p</i> (perm) |
|--------|----------|-----------------|
| Season | 0.51215  | <b>0.0051</b>   |
| Depth  | -0.09028 | 0.7101          |

Significant P-values are highlighted in bold

204

205

206 3.2 | Diet composition of three *Orestias* species

207

208 In total 396 gut contents were evaluated. 36 were empty (*Orestias luteus* = 21,  
209 *Orestias agassizii* = 13, *Orestias mulleri* = 2) and thus not analysed. Accumulation curve  
210 showed that the number of gut contents evaluated was adequate to make the inferences  
211 (Figure 2). To facilitate the analysis, the taxa Oligocheta, *Hydrozetes* sp. and Hirudinea  
212 were grouped in one category, named as "Other", due to their low representation in gut  
213 contents.

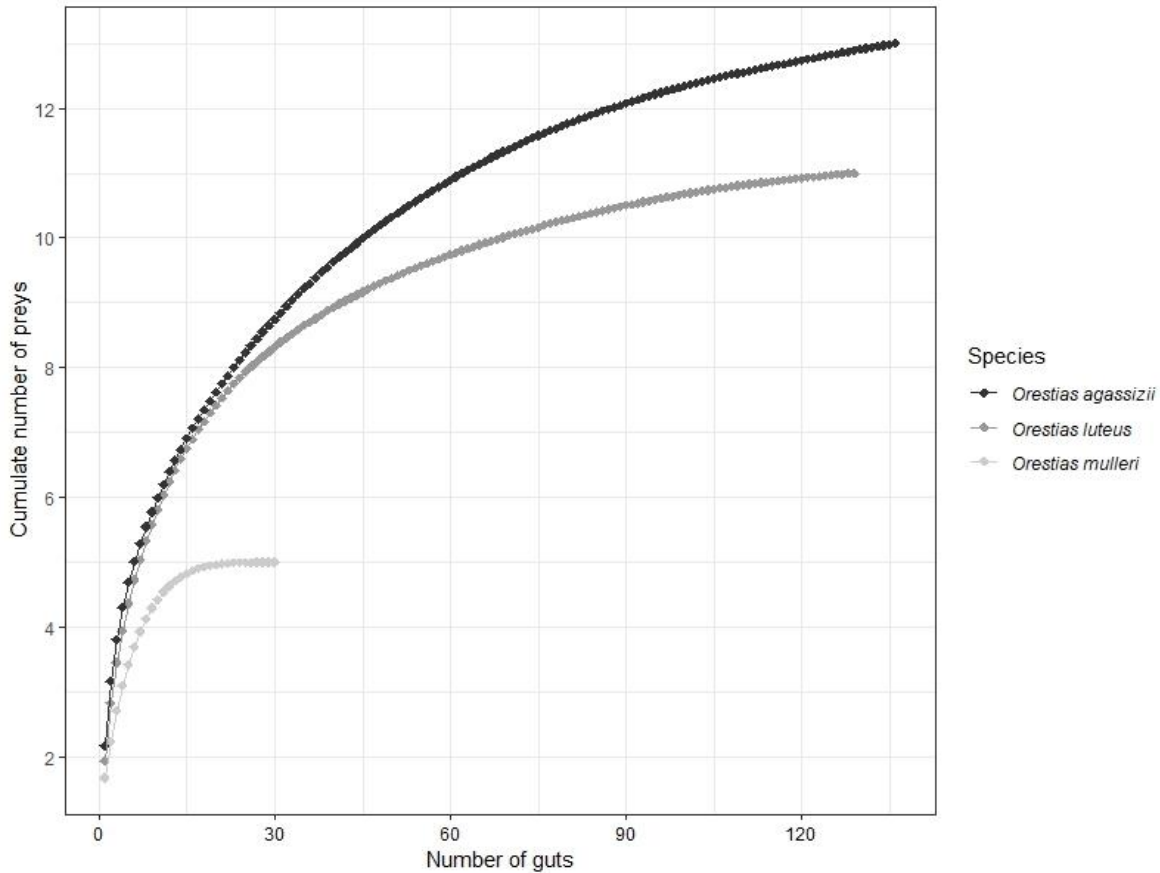

214

215 Figure 2. Preys accumulation curve with respect to the number of *Orestias* gut contents  
216 sampled in Lake Titicaca.

217 In general, the diet of these three *Orestias* species was based on amphipods, being  
218 the group most consumed (Figure 3). During rainy season, *O. luteus* showed intra-specific  
219 differences in their diet. The main prey in shallow waters were the amphipods (71.5%) and  
220 molluscs (62.7%) in waters with depths < 10 m. In contrast, during dry season its diet was  
221 based on amphipods (60.3% at a depth < 10 m and 76.8% at a depth > 10 m) and molluscs  
222 (28.5% at a depth < 10 m and 6.2% at a depth > 10 m). Prey diversity consumed (Simpson  
223 index) by this species was higher during rainy season, although diet breadth did not reflect  
224 such diversity ( $B_A < 0.6$ ) (Table 3).

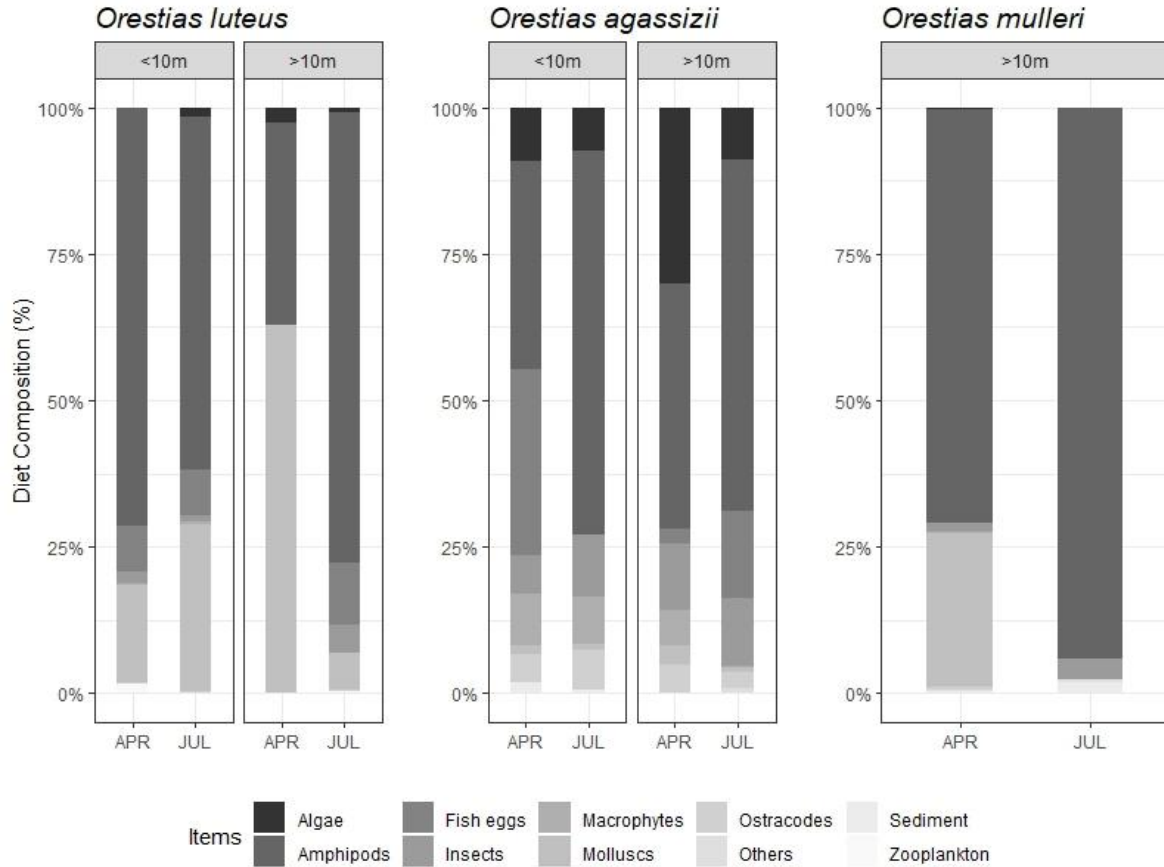

225

226 Figure 3. Predominance in diet composition of *Orestias luteus* (N = 157), *Orestias agassizii*  
 227 (N = 184) and *Orestias mulleri* (N = 32) from Lake Titicaca during end of rainy season  
 228 (APR) and dry season (JUL) in 2018.

229 *O. agassizii* has amphipods as its main prey, however, it was able to take advantage  
 230 of a larger number of resources ( $D = 0.71$ ,  $S = 12$ ) (Table 3). During rainy season it was fed  
 231 on fish eggs (31.7%) in shallow water, and algae (30.1%) in deep water. On the other hand,  
 232 during dry season *O. agassizii* fed of amphipods (65.7%) and insects (10.3%) and in areas  
 233 with depths < 10 m, it was also fed on fish eggs (14.9%). Diversity of prey consumed was  
 234 lower during this season, with a reduced trophic spectrum ( $B_A = 0.19$ ).

235

236

237 TABLE 3 Diversity (D), prey richness (S), Levins index (B) and standardized Levins index (B<sub>A</sub>) of three *Orestias* species. End of the  
 238 rainy season (APR), dry season (JUL).

| Species                       | Season | Depth  | N  | Simpson<br>index<br>(D) | S  | Simpson<br>index (D)<br>per season | S per<br>season | B<br>season | B <sub>A</sub><br>season | Simpson<br>index<br>(D) per<br>specie | S per<br>specie | B<br>Specie | B <sub>A</sub><br>Specie |
|-------------------------------|--------|--------|----|-------------------------|----|------------------------------------|-----------------|-------------|--------------------------|---------------------------------------|-----------------|-------------|--------------------------|
| <i>Orestias<br/>luteus</i>    | APR    | < 10 m | 63 | 0.44                    | 10 | 0.58                               | 10              | 2.40        | 0.16                     | 0.53                                  | 11              | 2.06        | 0.11                     |
|                               |        | >10 m  | 26 | 0.44                    | 5  |                                    |                 |             |                          |                                       |                 |             |                          |
|                               | JUL    | < 10 m | 48 | 0.33                    | 9  | 0.33                               | 9               | 1.49        | 0.06                     |                                       |                 |             |                          |
|                               |        | >10 m  | 20 | 0.34                    | 8  |                                    |                 |             |                          |                                       |                 |             |                          |
| <i>Orestias<br/>agassizii</i> | APR    | < 10 m |    |                         | 11 | 0.71                               | 12              | 3.47        | 0.22                     |                                       |                 |             |                          |
|                               |        | >10 m  | 46 | 0.69                    | 11 |                                    |                 |             |                          |                                       |                 |             |                          |
|                               | JUL    | < 10 m | 31 | 0.53                    | 7  | 0.53                               | 7               | 2.14        | 0.19                     | 0.69                                  | 13              | 2.93        | 16                       |
|                               |        | >10 m  | 60 | 0.53                    | 7  |                                    |                 |             |                          |                                       |                 |             |                          |
| <i>Orestias<br/>mulleri</i>   | APR    | >10 m  | 18 | 0.46                    | 5  | 0.46                               | 5               | 1.86        | 0.22                     |                                       |                 |             |                          |
|                               | JUL    | >10 m  | 14 | 0.52                    | 3  | 0.52                               | 3               | 2.07        | 0.54                     | 0.65                                  | 5               | 2.88        | 0.47                     |

239  
 240  
 241  
 242  
 243  
 244  
 245  
 246  
 247

248

249 *O. mulleri*, a species that was only found in deep waters (< 10 m), amphipods  
250 (70.6%) and molluscs (26.2%) were the main food items during rainy season. In contrast,  
251 for dry season, there was an almost exclusive feeding of amphipods (94%). *O. mulleri*  
252 showed prey diversity indexes similar between both seasons ( $D = 0.46$ ,  $D = 0.52$   
253 respectively), with a trophic breadth higher than the other *Orestias* species (0.47). Further,  
254 low prey richness ( $S = 5$ ) in both seasons ( $S = 5$ ,  $S = 3$ ; respectively) was observed (Table  
255 3).

256

257 3.3 | Seasonal and depth variations in diet composition of three *Orestias* species

258

259 Due to its low representativeness (<3%) both frequency of occurrence analysis, and  
260 numerical percentage analysis, Oligocheta, *Hydrozetes* sp., Hirudinea, *Anisancylus* sp. and  
261 sediments were grouped into a single category named "*Occasional prey*". *O. luteus*, during  
262 rainy season in shallow waters, fed on *Hyaella* spp. whose frequency of occurrence (%FO)  
263 comprised 48.4% and 74.9% in numerical percentage (%N). Hydrobiidae had a frequency  
264 of 14.3% and Cladocera with 14.9% N (Figure 4 and 5). At higher depths, their diet was  
265 based on Hydrobiidae with 48.4%FO and 67.6%N, followed by *Hyaella* spp. with  
266 37.3%FO and 21.6%N (Figure 4 and 5). During dry season *Hyaella* spp. represented a  
267 frequency of occurrence 35.7% and 50% for each depth, and a high numerical percentage  
268 of 75.7% and 80.3%.

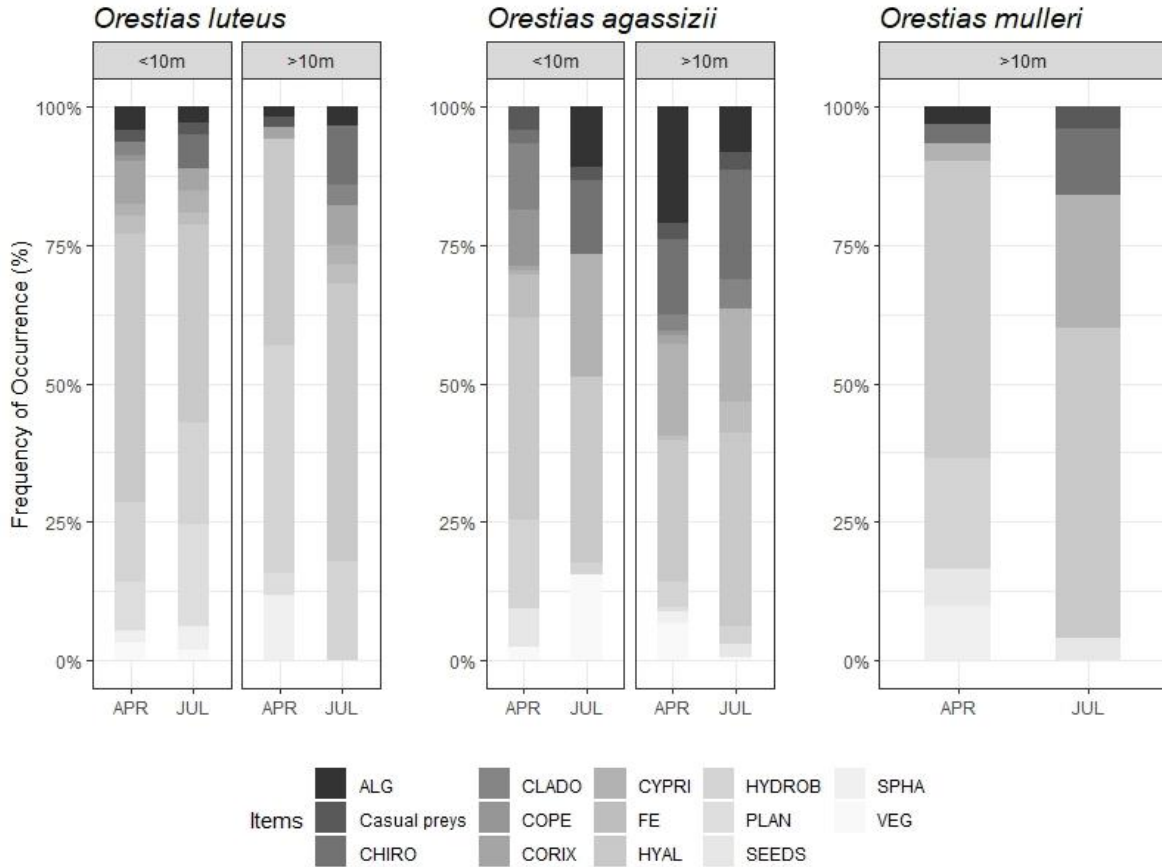

269

270 Figure 4. Frequency of occurrence (%FO) of prey taxa in diets of *Orestias luteus* (N =  
 271 157), *Orestias agassizii* (N = 184) and *Orestias mulleri* (N = 32) from Lake Titicaca during  
 272 end of rainy season (APR) and dry season (JUL) in 2018. Preys: algae (ALG),  
 273 Chironomidae (CHIRO), Cladocera (CLADO), Copepoda (COPE), Corixidae (CORIX),  
 274 Cyprididae (CYPRI), fish eggs (FE), *Hyaella* spp. (HYAL), Hydrobiidae (HYDROB),  
 275 Planorbidae (PLAN), macrophyte seeds (SEEDS), *Sphaerium* sp. (SPHA), vegetation  
 276 (VEG).

277 For *O. agassizii*, during rainy season at a depth < 10 m, *Hyaella* spp. had a  
 278 frequency of occurrence of 36.4% and Hydrobiidae (16.1%) (Figure 4). Instead, at a depth  
 279 > 10 m, amphipods represented 25.6%FO and algae 21.1%FO. On the other hand, the



280 numerical percentage for *O. agassizii* was dominated by Cladocera in shallow waters  
 281 (36.1%) and algae (61.8%) in deeper waters (Figure 5).

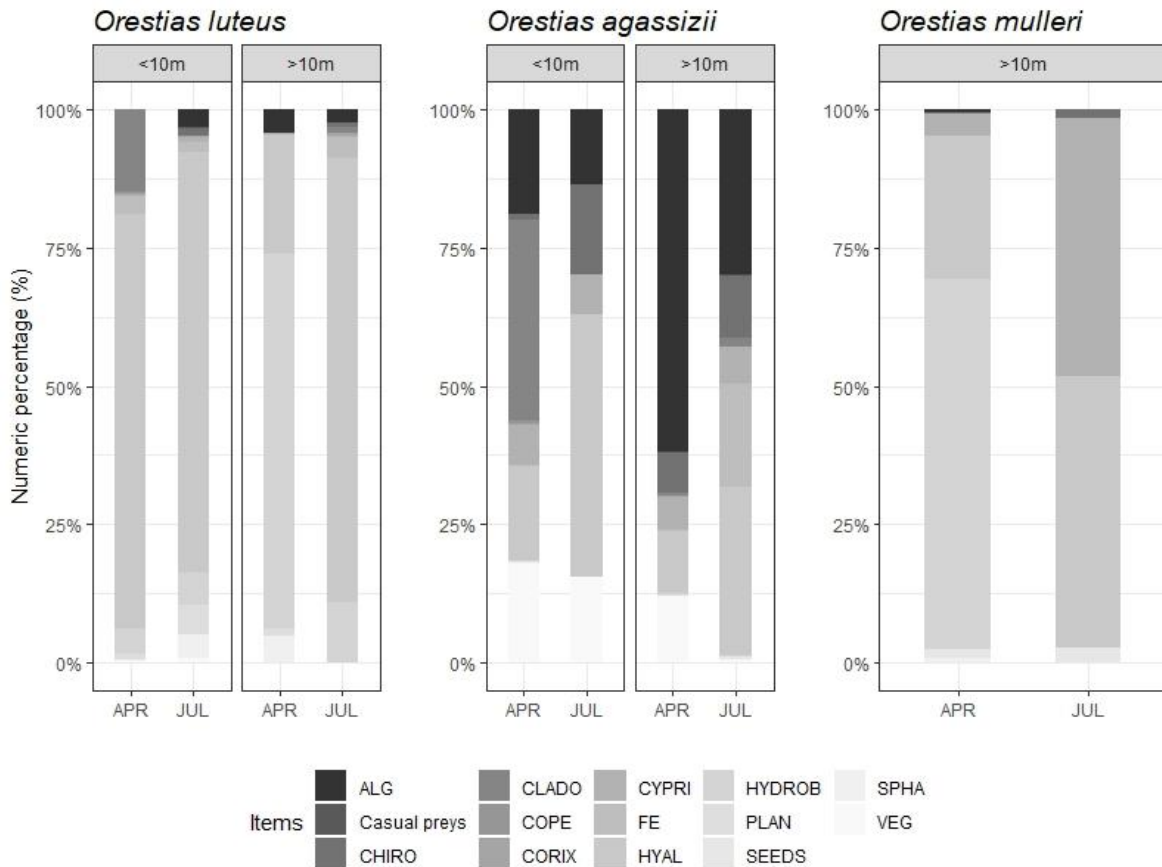

282

283 Figure 5. Numeric percentage (%N) of prey taxa in diets of *Orestias luteus* (N = 157),  
 284 *Orestias agassizii* (N = 184) and *Orestias mulleri* (N = 32) from Lake Titicaca during end  
 285 of rainy season (APR) and dry season (JUL) in 2018. Preys: algae (ALG), Chironomidae  
 286 (CHIRO), Cladocera (CLADO), Copepoda (COPE), Corixidae (CORIX), Cyprididae  
 287 (CYPRI), fish eggs (FE), *Hyaella* spp. (HYAL), Hydrobiidae (HYDROB), Planorbidae  
 288 (PLAN), macrophyte seeds (SEEDS), *Sphaerium* sp. (SPHA), vegetation (VEG).

289 In *O. agassizii* gut content during dry season, the main consumed prey was *Hyaella*  
 290 spp., which reached 33.3% FO and 35.1% FO, for each depth range. The importance of  
 291 Cyprididae (22.2% FO) at a depth < 10 m, and Chironomidae (19.8% FO) at a depth > 10 m,

292 increase during this season. Same patron is observed for amphipods in the numerical  
293 percentage, where they represent 47.2%N at a depth < 10 m of the *O. agassizii* gut content,  
294 and 30.3%N at a depth > 10 m. It is also remarkable that the intake of fish eggs (18.7%)  
295 increase.

296 *O. mulleri* was fed more frequently of *Hyaella* spp. during rainy season (53.3%FO)  
297 but with a higher numerical percentage of Hydrobiidae (67%N). Something similar was  
298 observed during dry season, where *Hyaella* spp. had a 56%FO and 48.9%N, followed by  
299 Cyprididae (46.7%N) (Figure 5).

300

301 3.4 | Intraspecific variation in diet composition and dietary overlap of three *Orestias* species

302

303 Feeding habits of *O. luteus* and *O. agassizii* showed intra-specific variations in  
304 relation to depth, but are more influenced by the season (Table 4). PERMANOVA test  
305 showed a significant difference in feeding habits in relation to the interaction of the season  
306 with the depth for both species. In contrast, these habits were relatively consistent at both  
307 seasons for *O. mulleri*. Further, Pianka's index indicate a total overlap between *O. luteus*  
308 and *O. agassizii* at the end of rainy season (Figure 6), which increases during dry season.  
309 Overlap was higher among all fish species and in both depths during dry season. *O.*  
310 *agassizii* and *O. luteus* in shallow waters had a higher overlap (0.94), there being a  
311 complete overlap between *O. agassizii* and *O. mulleri* at a depth > 10 m, followed by *O.*  
312 *luteus* with *O. mulleri* at the same depth range (Figure 7). Pianka's index suggest that  
313 dietary overlap is higher between the three species at both depths during the dry season.

314

315 TABLE 4 Results of PERMANOVA between different seasons and depths on the diet of  
 316 three *Orestias* species

| 317 | Source of variation       | df  | SS     | MS      | Pseudo-<br>F | R <sup>2</sup> | p (perm)      |
|-----|---------------------------|-----|--------|---------|--------------|----------------|---------------|
| 318 | <i>Orestias luteus</i>    |     |        |         |              |                |               |
| 319 | Season                    | 1   | 0.680  | 0.67959 | 2.2769       | 0.01668        | <b>0.0390</b> |
|     | Depth                     | 1   | 1.479  | 1.47940 | 4.9565       | 0.03632        | <b>0.0002</b> |
| 320 | Season*Depth              | 1   | 1.268  | 1.26807 | 4.2485       | 0.03113        | <b>0.0010</b> |
| 321 | Residuals                 | 125 | 37.310 | 0.29848 |              | 0.91587        |               |
| 322 | <i>Orestias agassizii</i> |     |        |         |              |                |               |
|     | Season                    | 1   | 0.675  | 0.67515 | 2.3523       | 0.01664        | <b>0.0214</b> |
| 323 | Depth                     | 1   | 1.197  | 1.19677 | 4.1697       | 0.0295         | <b>0.0007</b> |
|     | Season*Depth              | 1   | 0.813  | 0.81342 | 4.8341       | 0.02005        | <b>0.008</b>  |
| 324 | Residuals                 | 132 | 37.886 | 0.28701 |              | 0.93381        |               |
| 325 | <i>Orestias mulleri</i>   |     |        |         |              |                |               |
|     | Season                    | 1   | 0.4811 | 0.48109 | 1.9276       | 0.06441        | 0.1122        |
| 326 | Residuals                 | 28  | 6.9883 | 0.24958 |              | 0.93559        |               |

Significant P-values are highlighted in bold

327

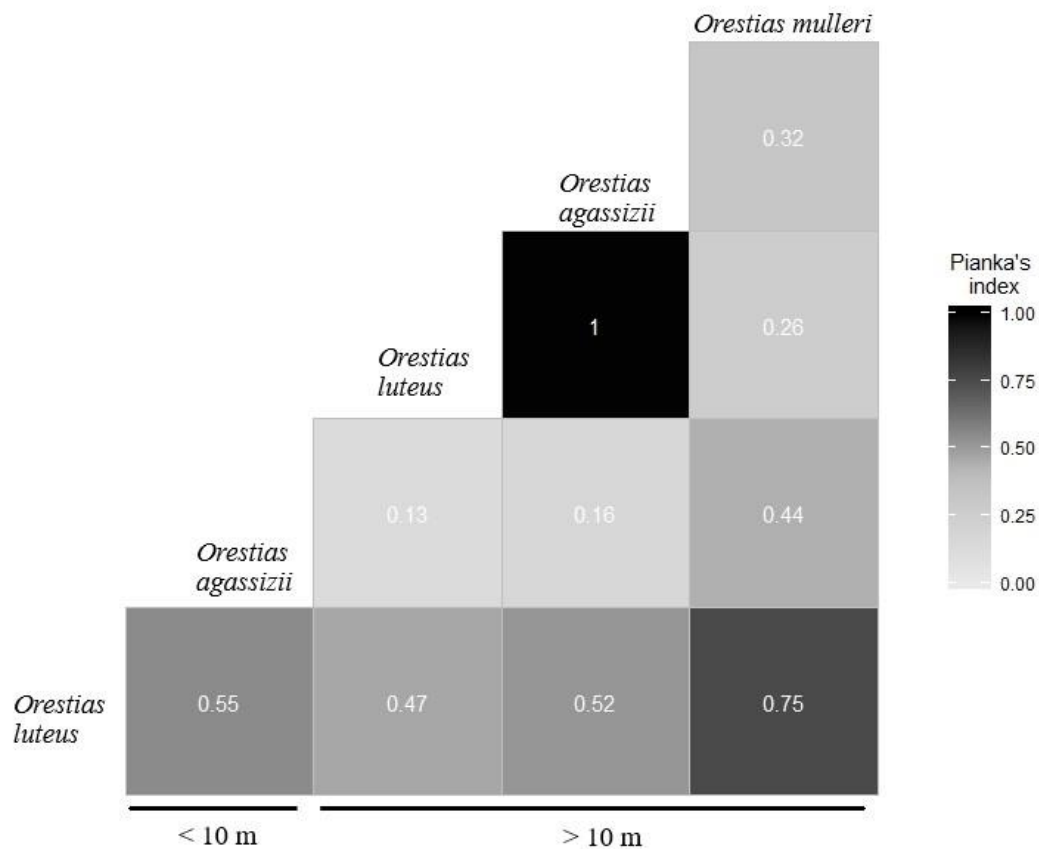

328

329 Figure 6. Dietary overlap between three *Orestias* species at the end of the rainy season

330 (April) 2018.

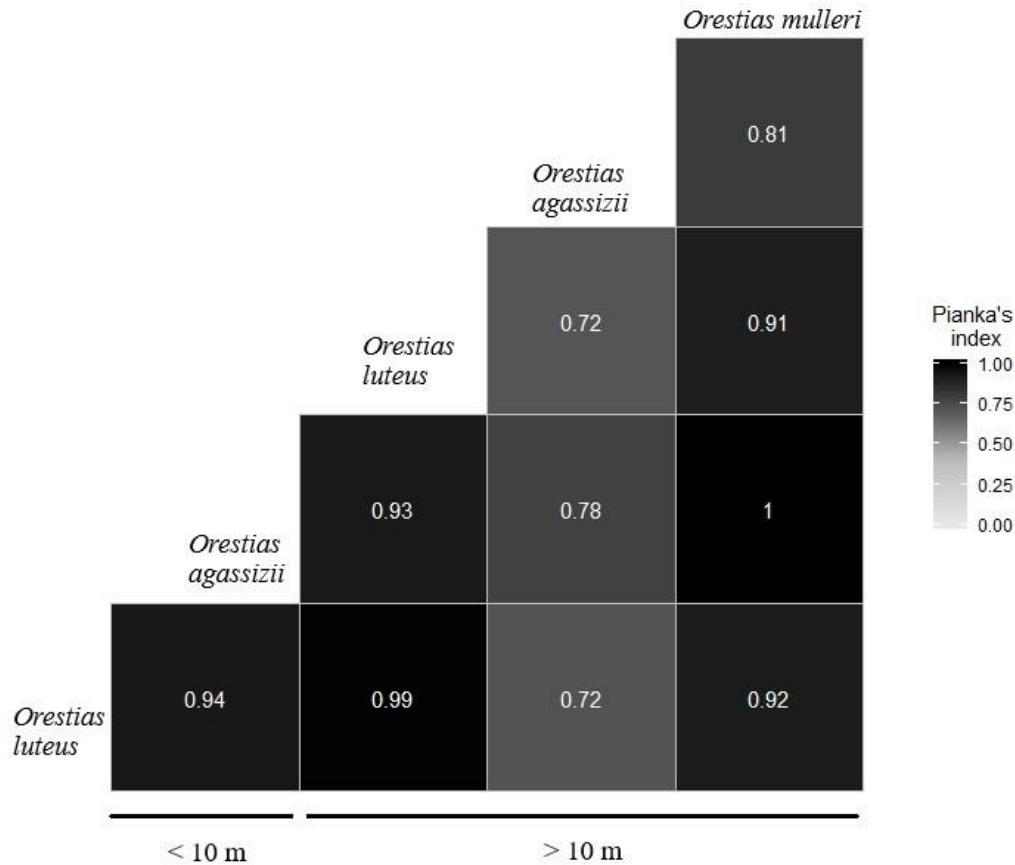

331

332 Figure 7. Dietary overlap between three *Orestias* species during dry season (July) 2018.

333

334 4 | DISCUSSION

335

336 Benthic fauna in shallow bays at Lake Titicaca is mainly represented by molluscs  
 337 and amphipods the former being the predominant group in the Characeas, whereas  
 338 chironomids and amphipods dominate the macrophytes areas (Dejoux, 1992). These does  
 339 not differ much in bare bottoms with deeps less than 20 m, where benthic fauna is higher in  
 340 molluscs and amphipods (Dejoux, 1992). Both taxa represent an essential component in the  
 341 biology of the lake due they perform an important role at trophic dynamics as well in  
 342 energy transfers (Dejoux, 1992). During this study, the benthic fauna was largely composed

343 of amphipods and molluscs (Hydrobiidae) and *Anisancylus* sp., which represent the main  
344 food resource for fish populations in the lake (Lauzanne, 1992; Vila *et al.*, 2007). The  
345 invertebrate composition did not change significantly with depth. However, during the dry  
346 season *Hyaella* spp. and Hirudinea had higher abundances than the rest of taxa, which was  
347 also observed in fish diets.

348         General observations indicated that *O. luteus* frequently inhabits shallow areas near  
349 to the shore of the lake, and usually feeds on aquatic insects and amphipods (Vila *et al.*,  
350 2007). During this study it was observed that *O. luteus* feeds mainly of amphipods and  
351 molluscs (Hydrobiidae and Planorbidae), taking advantage of fish eggs as a resource in  
352 shallow waters. During dry season the patron remained the same, but the intake of fish eggs  
353 was higher, especially at a depth > 10 m. The intake of fish eggs by this species seems to be  
354 a frequent behaviour, also reported by Maldonado *et al.* (2009).

355         *O. agassizii* showed a varied diet, although similarly predominated by amphipods.  
356 *O. agassizii* is generally classified as a ubiquitous species, due to its ability to inhabit most  
357 lacustrine habitats (Lauzanne, 1992). Such ability was observed in the feeding habits,  
358 because during rainy season it was fed on zooplankton (Cladocera) at a depth < 10 m, and  
359 algae at a depth >10 m. In contrast, during dry season it was also fed on ostracods  
360 (Cyprididae), algae and vegetation (macrophytes) at a depth < 10 m, and also fed of  
361 Chironomidae at a depth > 10 m (Figure 4). This feeding behaviour of *O. agassizii* was also  
362 described for saline ecosystems populations of the southern of Altiplano (Chile), where a  
363 wide diet was found (Guzmán & Sielfeld, 2009). Nevertheless, even though such behaviour  
364 was also reported for this species in Lake Titicaca (Lauzanne, 1992), *O. agassizii* showed  
365 to taking advantage of prey abundance in the habitat.

366 According to Monroy et al., (2014), *O. agassizii* is an omnivorous species, and like  
367 other Cyprinodontiform species (Kalogianni *et al.*, 2010; Alcaraz *et al.*, 2015) it is not  
368 possible to generalize the feeding pattern for this species throughout the lake without  
369 considering other influencing factors (Saikia, 2016; Yoğurtçuoğlu *et al.*, 2018). A clear  
370 influence of seasonality and depth was observed in the results, which has influenced by  
371 feeding habits changing the proportions and importance of the prey (Table 4). Amphipods,  
372 zooplankton and ostracods seem to be the main food resource for *O. agassizii* across the  
373 region (Guzmán & Sielfeld, 2009; Maldonado *et al.*, 2009). For this reason, it could be  
374 mentioned that *O. agassizii* is a species capable of adapting its diet to the existing resources  
375 in the habitat, modifying it according to the season and availability.

376 *O. mulleri*, also classified as omnivorous (Monroy *et al.*, 2014) is described, by only  
377 observations as a species that bases its diet on molluscs and ostracods (Lauzanne, 1992;  
378 Vila *et al.*, 2007). However, like the other *Orestias* studied, *O. mulleri* fed mainly on  
379 amphipods, with a frequency higher than 50% for both seasons. Molluscs (Hidrobiidae)  
380 were the secondary prey during rainy season, and ostracods (Cyprididae) and Chironomidae  
381 for dry season (Figure 4 and 5). There is a lack of knowledge on the feeding habits of this  
382 species, so this work is the first to contain detailed information on their diet.

383 Although *Orestias* diet does not showed changes in its composition between depths  
384 and seasons, it certainly does the prey abundances in the gut content. It is possible to  
385 mention that *Orestias* have an opportunistic diet, consuming the prey with higher  
386 abundance in the ecosystem. Low variation in prey richness, the reduced use of trophic  
387 resource and the observed overlap showed a certain preference for amphipods in *Orestias*  
388 diet. Therefore, the usage increase or decrease of one resource may be due to spatial  
389 segregation, something suggested for these native species of the lake (Monroy *et al.*, 2014).

390 During this study, the *Orestias* fish showed that all of them can feed on the same prey, even  
391 overlapping their diets (Figure 6). Diet overlapping increased during dry season (Figure 7),  
392 where the water temperature decreased a few degrees (Dejoux & Iltis, 1992). Temperature  
393 decreasing could influence the prey availability, or could reduce the effort for searching  
394 food by these fish.

395 Amphipods are the most exploited food resource, not only for native fish  
396 populations in Lake Titicaca, but also for introduced fish (*Odontesthes bonariensis* and  
397 *Oncorhynchus mykiss*) (Vaux *et al.*, 1988; Vila *et al.*, 2007). It is worth mentioning that  
398 during this investigation three possible species of amphipods were identified: *Hyaella* cf.  
399 *cuprea*, *Hyaella* cf. *latimanus*, and in deep zones (> 10 m) *Hyaella* cf. *longipes*. *Hyaella*  
400 cf. *cuprea* and *Hyaella* cf. *longipes* were observed in habitat and in the gut contents of *O.*  
401 *mulleri*. The most abundant in the habitat as well in the gut contents was *Hyaella* cf.  
402 *cuprea*.

403 Amphipods and molluscs represent an important component in the diet of other  
404 vertebrates in Lake Titicaca. For example, Titicaca's water frog (*Telmatobius culeus*)  
405 (Muñoz-Saravia, 2018) diet is based on amphipods and molluscs, similar to *O. luteus* and *O.*  
406 *mulleri*. Nutritional values of amphipods show an important energy contribution (crude  
407 protein = 43%, gross energy = 13 kJ / g) (Muñoz-Saravia, 2018). This, added to the great  
408 abundance of this group in its habitat, could be the reason why most of the aquatic  
409 vertebrates of this ecosystem feed on this resource. However, it is not the same with  
410 molluscs (Hydrobiidae), whose nutritional contribution is clearly lower than other groups  
411 (crude protein = 15.6%, gross energy = 3.4 kJ / g) (For more information on nutritional  
412 composition in the diet of Titicaca water frog refer to Muñoz-Saravia, 2018). Although  
413 molluscs were an important component of *Orestias* diet, these do not seem to have an



414 important nutritional contribution because molluscs do not undergo any change as digestion  
415 progress, making their identification even easier in the gut content (Hyslop, 1980; Baker *et*  
416 *al.*, 2014).

417         Some molluscs even survive passing through the digestive tract of the fish. Lazzaro  
418 (1987) reports that the ostracods *Cypridopsis vidua* (Family Cyprididae) survives passing  
419 through the intestine of the sunfish (*Lepomis macrochirus*, Rafinesque, 1810) leading a  
420 negative selectivity to this prey (Vinyard & O'brien, 1976).

421         Planktivorous fish developed a strategy to avoid the deficiency in feeding due to the  
422 low digestibility caused by molluscs increasing the intake of these preys (Lazzaro, 1987).  
423 Muñoz-Saravia (2018) suggests that, in the case of Titicaca's water frog, feeding of  
424 molluscs can help to shred the amphipods exoskeleton. Another possibility is that feeding  
425 of molluscs may delay the passage of food through the intestine giving a higher digestion  
426 time for the nutrient assimilation. This strategy could be the same for *Orestias* due to the  
427 high abundance of molluscs in its diet, especially for fish associated to the bottoms of the  
428 lake (*O. luteus* and *O. mulleri*). Importance of amphipods and molluscs in *Orestias* diet  
429 highlights the need for more studies focused on the nutritional profile of these fish in wild  
430 conditions, as well as the nutritional contribution they provide.

431         In conclusion, *Orestias* species inhabiting the Toke Pucuro bay of Lake Titicaca  
432 base their diet on amphipods and molluscs. The observed depth-related changes support  
433 spatial segregation among these fish, nevertheless, the change in prey abundance of  
434 *Orestias* diet is more influenced by seasonality. Based on diet composition *O. luteus* and *O.*  
435 *mulleri* are invertivore species. *O. mulleri* has a greater diet breadth in relation to the prey  
436 richness on the habitat. On the other hand, *O. agassizii* showed to be an opportunistic  
437 omnivorous that feeds of the resource that has the highest abundance, shifting its feeding

438 habits as the depth in the habitat increases. Due the use of the same trophic resource, these  
439 three *Orestias* species compete against themselves, which is more evident during the dry  
440 season. It is necessary to guide future researches on these species to analyse their food and  
441 nutritional requirements, considering the possibility of breeding them in captivity, which  
442 could reduce the exploitation of wild populations already affected by local overfishing.

#### 443 ACKNOWLEDGMENTS

444

445 Funding for this study came from the “*Erika Geyger*” grants for young researchers from  
446 Instituto de Ecología-UMSA and FUNDECO (Fundación para el Desarrollo de la  
447 Ecología). I am grateful to Rogelio Alcón (fisherman), Ariel Kallisaya, Oscar Ayala, Jorge  
448 Molina-Rodríguez, Carla Ibáñez, Oscar Rollano, Valeria Palma and Arturo Muñoz-Saravia  
449 for their assistance, help with the literature review and discussion on the relevance of  
450 feeding ecology of native species.

451

452

453

454

455

456

457

458

459

460

461

462 REFERENCES

- 463 Alcaraz C., Gholami Z., Esmaeili H.R. & García-Berthou E. (2015). Herbivory and  
464 seasonal changes in diet of a highly endemic cyprinodontid fish (*Aphanius farsicus*).  
465 *Environmental Biology of Fishes* **98**, 1541–1554. [https://doi.org/10.1007/s10641-](https://doi.org/10.1007/s10641-015-0381-9)  
466 [015-0381-9](https://doi.org/10.1007/s10641-015-0381-9)
- 467 Baker R., Buckland A. & Sheaves M. (2014). Fish gut content analysis: robust measures of  
468 diet composition. *Fish and Fisheries* **15**, 170–177. <https://doi.org/10.1111/faf.12026>
- 469 Buckland A., Baker R., Loneragan N. & Sheaves M. (2017). Standardising fish stomach  
470 content analysis: The importance of prey condition. *Fisheries Research* **196**, 126–  
471 140. <https://doi.org/10.1016/j.fishres.2017.08.003>
- 472 Cardona L. (1991). Measurement of trophic niche breadth using occurrence frequencies.  
473 *Journal of Fish Biology* **39**, 901–903. [https://doi.org/10.1111/j.1095-](https://doi.org/10.1111/j.1095-8649.1991.tb04420.x)  
474 [8649.1991.tb04420.x](https://doi.org/10.1111/j.1095-8649.1991.tb04420.x)
- 475 Cuvier G.L. & Valenciennes A. (1846). Des Orestias. In: *Histoire naturelle des poissons*.  
476 (Eds G.L. Cuvier & A. Valenciennes), pp. 221–244.
- 477 Dejoux C. (1992). Benthic populations. Distribution and annual variations. In: *Lake*  
478 *Titicaca: a synthesis of limnological knowledge*, Kluwer Academic. pp. 387–405.  
479 Dordrecht (NLD).
- 480 Dejoux C. & Iltis A. (1992). *Lake Titicaca: a synthesis of limnological knowledge*, Kluwer  
481 Academic. Dordrecht (NLD).
- 482 Frost W.E. & Went A.E. (1940). River Liffey Survey III. The growth and food of young  
483 salmon. In: *Proceedings of the Royal Irish Academy. Section B: Biological,*  
484 *Geological, and Chemical Science*. pp. 53–80. JSTOR.

- 485 Guerrero C.J., Poulin E., Méndez M.A. & Vila I. (2015). Caracterización trófica de Orestias  
486 (Teleostei: Cyprinodontidae) en el Parque Nacional Lauca. *Gayana (Concepción)*  
487 **79**, 18–25. <https://doi.org/10.4067/S0717-65382015000100004>
- 488 Guerrero-Jiménez C.J., Peña F., Morales P., Méndez M.A., Sallaberry M., Vila I., *et al.*  
489 (2017). Correction: Pattern of genetic differentiation of an incipient speciation  
490 process: The case of the high Andean killifish Orestias. *PLOS ONE* **12**, e0177498.  
491 <https://doi.org/10.1371/journal.pone.0177498>
- 492 Guzmán J.A. & Sielfeld W. (2009). Dieta de Orestias agassii (Cuvier & Valenciennes,  
493 1846) (TELEOSTEI: CYPRINIDONTIDAE) del salar del Huasco, norte de Chile.  
494 *Gayana (Concepción)* **73**. <https://doi.org/10.4067/S0717-65382009000100004>
- 495 Hurlbert S.H. (1971). The Nonconcept of Species Diversity: A Critique and Alternative  
496 Parameters. *Ecology* **52**, 577–586. <https://doi.org/10.2307/1934145>
- 497 Hyslop E.J. (1980). Stomach contents analysis—a review of methods and their application.  
498 *Journal of fish biology* **17**, 411–429. [https://doi.org/10.1111/j.1095-](https://doi.org/10.1111/j.1095-8649.1980.tb02775.x)  
499 [8649.1980.tb02775.x](https://doi.org/10.1111/j.1095-8649.1980.tb02775.x)
- 500 Ibañez C., Hugueny B., Esquer Garrigos Y., Zepita C. & Gutierrez R. (2014).  
501 Biodiversidad Ictica en el Lago Titicaca. In: *Línea base de conocimientos sobre los*  
502 *recursos hidrológicos e hidrobiológicos en el sistema TDPS con enfoque en la*  
503 *cuenca del Lago Titicaca*. pp. 141–159. Quito, Ecuador.
- 504 Jinlong Z. (2016). *spaa: SPecies Association Analysis. R package version 0.2.2.*
- 505 Kalogianni E., Giakoumi S., Andriopoulou A. & Chatzinikolaou Y. (2010). Feeding  
506 ecology of the critically endangered Valencia letourneuxi (Valenciidae). *Aquatic*  
507 *Ecology* **44**, 289–299. <https://doi.org/10.1007/s10452-009-9253-8>

- 508 Kindt R. & Coe R. (2005). *Tree diversity analysis. A manual and software for common*  
509 *statistical methods for ecological and biodiversity studies. World Agroforestry*  
510 *Centre (ICRAF). Nairobi, Kenya.*
- 511 Krebs C.J. (1999). *Ecological methodology*, 2nd ed. Benjamin/Cummings, Menlo Park,  
512 Calif.
- 513 Lauzanne L. (1982). Les Orestias (Pisces, Cyprinodontidae) du Petit Lac Titicaca. *Revue*  
514 *d'Hydrobiologie Tropicale* **15**, 39–70
- 515 Lauzanne L. (1992). Native species the Orestias. In: *Lake Titicaca: a synthesis of*  
516 *limnological knowledge*, Kluwer Academic. pp. 405–419. Dordrecht (NLD).
- 517 Lazzaro X. (1987). A review of planktivorous fishes: Their evolution, feeding behaviours,  
518 selectivities, and impacts. *Hydrobiologia* **146**, 97–167.  
519 <https://doi.org/10.1007/BF00008764>
- 520 Levins R.A. (1974). *Evolution in changing environments ; some theoretical explorations*, 3.  
521 printing. Princeton Univ. Press, Princeton, NJ.
- 522 Loubens G. (1989). Observations on the fishes of the Bolivian part of Lake Titicaca. IV.  
523 Orestias spp., Salmo gairdneri and management problems. *Revue d'Hydrobiologie*  
524 *Tropicale* **22**, 157–177
- 525 Magurran A.E. (2013). *Measuring biological diversity*. John Wiley & Sons.
- 526 Maldonado E., Hubert N., Sagnes P. & De Mérona B. (2009). Morphology–diet  
527 relationships in four killifishes (Teleostei, Cyprinodontidae, Orestias) from Lake  
528 Titicaca. *Journal of Fish Biology* **74**, 502–520. [https://doi.org/10.1111/j.1095-](https://doi.org/10.1111/j.1095-8649.2008.02140.x)  
529 [8649.2008.02140.x](https://doi.org/10.1111/j.1095-8649.2008.02140.x)

- 530 Metcalfe J.D. & Craig J.F. (2011). Ethical justification for the use and treatment of fishes in  
531 research: an update. *Journal of Fish Biology* **78**, 393–394.  
532 <https://doi.org/10.1111/j.1095-8649.2010.02900.x>
- 533 Monroy M., Maceda-Veiga A., Caiola N. & De Sostoa A. (2014). Trophic interactions  
534 between native and introduced fish species in a littoral fish community: trophic  
535 interactions in lake titicaca fishes. *Journal of Fish Biology* **85**, 1693–1706.  
536 <https://doi.org/10.1111/jfb.12529>
- 537 Muñoz-Saravia A. (2018). *Foraging strategies and ecology of Titicaca water frog*  
538 *(Telmatobius culeus)*. Ghent University. Faculty of Veterinary Medicine, Merlbeke,  
539 Belgium., Merelbeke, Belgium.
- 540 Myers N., Mittermeier R.A., Mittermeier C.G., da Fonseca G.A.B. & Kent J. (2000).  
541 Biodiversity hotspots for conservation priorities. *Nature* **403**, 853.  
542 <https://doi.org/10.1038/35002501>
- 543 Oksanen J., Blanchet G., Friendly M., Kindt R., Legendre P., McGlenn D., *et al.* (2018).  
544 *vegan: Community Ecology Package. R package version 2.5-3.*
- 545 Pianka E.R. (1974). Niche Overlap and Diffuse Competition. *Proceedings of the National*  
546 *Academy of Sciences* **71**, 2141–2145. <https://doi.org/10.1073/pnas.71.5.2141>
- 547 R Core Team (2018). *R: A Language and Environment for Statistical Computing. R*  
548 *Foundation for Statistical Computing. Vienna, Austria.*
- 549 RStudio Team (2016). *RStudio: Integrated Development Environment for R. RStudio, Inc.*  
550 *Boston, MA.*
- 551 Saikia S.K. (2016). On the methodology of feeding ecology in fish. *European Journal of*  
552 *Ecology* **2**, 35–46. <https://doi.org/10.1515/eje-2016-0004>

- 553 Tresierra Aguilar A.E. & Culquichicón Malpica Z.G. (1993). *Biología pesquera*. Consejo  
554 Nacional de Ciencia y Tecnología, Lima (Peru).
- 555 Vaux P., Wurtsbaugh W., Trevino H., Marino L., Bustamante E., Torres J., *et al.* (1988).  
556 Ecology of the Pelagic Fishes of Lake Titicaca, Peru-Bolivia. *Biotropica* **20**, 220.  
557 <https://doi.org/10.2307/2388237>
- 558 Vila I., Pardo R. & Scott S. (2007). Freshwater fishes of the Altiplano. *Aquatic Ecosystem*  
559 *Health & Management* **10**, 201–211. <https://doi.org/10.1080/14634980701351395>
- 560 Vinyard G.L. & O'brien W.J. (1976). Effects of Light and Turbidity on the Reactive  
561 Distance of Bluegill ( *Lepomis macrochirus* ). *Journal of the Fisheries Research*  
562 *Board of Canada* **33**, 2845–2849. <https://doi.org/10.1139/f76-342>
- 563 Yoğurtçuoğlu B., Kirankaya Ş.G., Gençoğlu L. & Ekmekçi F.G. (2018). Feeding ecology  
564 of the Kızılırmak toothcarp, *Aphanius marassantensis*: ontogenetic shift and  
565 seasonal diet variation. *Environmental Biology of Fishes* **101**, 1493–1502.  
566 <https://doi.org/10.1007/s10641-018-0794-3>
- 567 Zavala-Camin L.A. (1996). *Introdução aos estudos sobre alimentação natural em peixes*.  
568 São Paulo-Maringá: EDUEM, Brasil.
- 569
